# Supplementary material
Source: PubMed Central journal article supplement (PMC4256552)
Supplement: hesr0049-2041-sd1.pdf [file hesr0049-2041-sd1.pdf]

Electronic Appendix Table: Odds Ratios for Industry Dummy Variables for Models of Tables 2A-2D

|                                | P(income rises above 138% FPL)<br>Spell in progress at start | P(income rises above 138% FPL)<br>Fresh spell | P(income falls below 138%)<br>Spell in progress at start | P(income falls below 138%)<br>Fresh spell | P(income rises above 250%)<br>Spell in progress at start | P(income rises above 250%)<br>Fresh spell | P(income falls below 250%)<br>Spell in progress at start | P(income falls below 250%)<br>Fresh spell | P(income rises above 400%)<br>Spell in progress at start | P(income rises above 400%)<br>Fresh spell | P(income falls below 400% FPL)<br>Spell in progress at start | P(income falls below 400% FPL)<br>Fresh spell |
|--------------------------------|--------------------------------------------------------------|-----------------------------------------------|----------------------------------------------------------|-------------------------------------------|----------------------------------------------------------|-------------------------------------------|----------------------------------------------------------|-------------------------------------------|----------------------------------------------------------|-------------------------------------------|--------------------------------------------------------------|-----------------------------------------------|
| Agriculture                    | 0.830<br>(0.048)**                                           | 0.927<br>(0.027)*                             | 1.073<br>(0.072)                                         | 1.015<br>(0.067)                          | 0.733<br>(0.058)**                                       | 0.817<br>(0.035)**                        | 1.063<br>(0.085)                                         | 1.123<br>(0.053)*                         | 0.806<br>(0.073)*                                        | 0.793<br>(0.037)**                        | 1.060<br>(0.074)                                             | 1.111<br>(0.033)**                            |
| Mining                         | 1.437<br>(0.169)**                                           | 1.293<br>(0.092)**                            | 0.772<br>(0.162)                                         | 0.533<br>(0.087)**                        | 1.092<br>(0.125)                                         | 1.399<br>(0.063)**                        | 0.844<br>(0.099)                                         | 0.787<br>(0.066)**                        | 1.123<br>(0.084)                                         | 1.116<br>(0.046)**                        | 0.856<br>(0.064)*                                            | 1.100<br>(0.065)                              |
| Construction                   | 1.215<br>(0.054)**                                           | 1.250<br>(0.021)**                            | 0.808<br>(0.053)**                                       | 0.667<br>(0.018)**                        | 1.069<br>(0.033)*                                        | 1.259<br>(0.026)**                        | 0.876<br>(0.065)                                         | 0.785<br>(0.021)**                        | 1.054<br>(0.049)                                         | 1.179<br>(0.031)**                        | 0.852<br>(0.023)**                                           | 1.002<br>(0.021)                              |
| Utilities                      | 0.887<br>(0.106)                                             | 1.303<br>(0.054)**                            | 0.565<br>(0.101)**                                       | 0.523<br>(0.051)**                        | 1.043<br>(0.066)                                         | 1.274<br>(0.033)**                        | 0.814<br>(0.073)*                                        | 0.617<br>(0.031)**                        | 1.084<br>(0.057)                                         | 1.291<br>(0.018)**                        | 0.806<br>(0.054)**                                           | 1.078<br>(0.067)                              |
| Nondurables manufacturing      | 1.068<br>(0.044)                                             | 1.124<br>(0.017)**                            | 0.867<br>(0.052)*                                        | 0.773<br>(0.050)**                        | 0.897<br>(0.036)**                                       | 1.184<br>(0.042)**                        | 0.988<br>(0.037)                                         | 0.977<br>(0.022)                          | 0.941<br>(0.035)                                         | 1.016<br>(0.024)                          | 0.901<br>(0.048)                                             | 1.119<br>(0.037)**                            |
| Durables manufacturing         | 1.201<br>(0.090)*                                            | 1.198<br>(0.024)**                            | 0.699<br>(0.046)**                                       | 0.621<br>(0.020)**                        | 1.055<br>(0.032)                                         | 1.289<br>(0.029)**                        | 0.947<br>(0.039)                                         | 0.870<br>(0.015)**                        | 0.977<br>(0.033)                                         | 1.122<br>(0.025)**                        | 0.870<br>(0.034)**                                           | 1.113<br>(0.031)**                            |
| Wholesale trade                | 1.070<br>(0.055)                                             | 1.116<br>(0.022)**                            | 0.723<br>(0.049)**                                       | 0.647<br>(0.023)**                        | 1.022<br>(0.047)                                         | 1.246<br>(0.041)**                        | 0.809<br>(0.039)**                                       | 0.782<br>(0.015)**                        | 1.062<br>(0.045)                                         | 1.172<br>(0.022)**                        | 0.864<br>(0.027)**                                           | 1.103<br>(0.023)**                            |
| Retail trade                   | 1.098<br>(0.039)**                                           | 1.026<br>(0.023)                              | 0.837<br>(0.029)**                                       | 0.819<br>(0.012)**                        | 0.930<br>(0.028)*                                        | 1.054<br>(0.026)*                         | 0.960<br>(0.036)                                         | 1.001<br>(0.014)                          | 0.893<br>(0.041)*                                        | 0.972<br>(0.025)                          | 0.957<br>(0.017)*                                            | 1.110<br>(0.036)**                            |
| Transportation                 | 1.147<br>(0.052)**                                           | 1.163<br>(0.022)**                            | 0.768<br>(0.041)**                                       | 0.665<br>(0.021)**                        | 1.054<br>(0.042)                                         | 1.231<br>(0.026)**                        | 0.913<br>(0.064)                                         | 0.839<br>(0.042)**                        | 0.958<br>(0.043)                                         | 1.092<br>(0.041)*                         | 0.845<br>(0.020)**                                           | 1.019<br>(0.021)                              |
| Communications, information    | 1.241<br>(0.091)**                                           | 1.128<br>(0.038)**                            | 0.660<br>(0.055)**                                       | 0.590<br>(0.021)**                        | 1.063<br>(0.040)                                         | 1.268<br>(0.049)**                        | 0.730<br>(0.036)**                                       | 0.745<br>(0.015)**                        | 1.092<br>(0.035)**                                       | 1.162<br>(0.035)**                        | 0.780<br>(0.033)**                                           | 1.008<br>(0.020)                              |
| Prof., technical services      | 1.301<br>(0.071)**                                           | 1.252<br>(0.039)**                            | 0.525<br>(0.075)**                                       | 0.548<br>(0.034)**                        | 1.185<br>(0.067)**                                       | 1.370<br>(0.030)**                        | 0.702<br>(0.036)**                                       | 0.627<br>(0.014)**                        | 1.117<br>(0.036)**                                       | 1.285<br>(0.017)**                        | 0.710<br>(0.033)**                                           | 0.968<br>(0.031)                              |
| Mgmt., admin. support services | 1.053<br>(0.052)                                             | 1.100<br>(0.019)**                            | 0.916<br>(0.043)                                         | 0.808<br>(0.029)**                        | 0.879<br>(0.027)**                                       | 1.019<br>(0.030)                          | 0.923<br>(0.066)                                         | 0.911<br>(0.023)**                        | 0.906<br>(0.049)                                         | 0.969<br>(0.033)                          | 0.875<br>(0.034)**                                           | 1.017<br>(0.020)                              |

|                                   |                    |                    |                    |                    |                    |                    |                    |                    |                    |                    |                    |                    |
|-----------------------------------|--------------------|--------------------|--------------------|--------------------|--------------------|--------------------|--------------------|--------------------|--------------------|--------------------|--------------------|--------------------|
| Education                         | 1.111<br>(0.038)** | 1.074<br>(0.020)** | 0.913<br>(0.075)   | 0.884<br>(0.023)** | 0.913<br>(0.025)** | 0.998<br>(0.013)   | 0.980<br>(0.037)   | 0.947<br>(0.016)** | 0.890<br>(0.032)** | 0.930<br>(0.017)** | 1.076<br>(0.018)** | 1.057<br>(0.013)** |
| Health care,<br>social assistance | 1.152<br>(0.057)** | 1.063<br>(0.019)** | 0.753<br>(0.036)** | 0.669<br>(0.015)** | 1.045<br>(0.038)   | 1.145<br>(0.024)** | 0.900<br>(0.035)** | 0.884<br>(0.021)** | 1.010<br>(0.038)   | 1.019<br>(0.026)   | 0.922<br>(0.025)** | 1.072<br>(0.033)*  |
| Arts,<br>entertainment            | 1.159<br>(0.064)** | 0.993<br>(0.039)   | 0.772<br>(0.091)*  | 0.718<br>(0.043)** | 1.121<br>(0.068)   | 1.129<br>(0.026)** | 1.014<br>(0.079)   | 1.013<br>(0.029)   | 0.830<br>(0.041)** | 0.939<br>(0.032)   | 0.948<br>(0.049)   | 1.062<br>(0.033)*  |
| Accommodations,<br>food services  | 0.969<br>(0.047)   | 0.924<br>(0.013)** | 1.010<br>(0.041)   | 0.982<br>(0.031)   | 0.861<br>(0.029)** | 0.874<br>(0.026)** | 1.172<br>(0.042)** | 1.106<br>(0.018)** | 0.782<br>(0.039)** | 0.828<br>(0.025)** | 1.040<br>(0.031)   | 1.047<br>(0.027)   |
| Other services                    | 1.015<br>(0.066)   | 1.054<br>(0.022)*  | 0.820<br>(0.049)** | 0.775<br>(0.018)** | 0.985<br>(0.033)   | 1.070<br>(0.023)** | 0.895<br>(0.039)*  | 0.985<br>(0.039)   | 0.879<br>(0.045)*  | 0.942<br>(0.039)   | 0.985<br>(0.034)   | 1.064<br>(0.021)** |
| Public<br>administration          | 1.178<br>(0.070)** | 1.090<br>(0.020)** | 0.653<br>(0.043)** | 0.560<br>(0.020)** | 1.056<br>(0.044)   | 1.191<br>(0.020)** | 0.790<br>(0.028)** | 0.750<br>(0.018)** | 1.051<br>(0.038)   | 1.080<br>(0.027)** | 0.827<br>(0.037)** | 1.034<br>(0.037)   |
| Unempl. former<br>Armed Forces    | 1.314<br>(0.169)*  | 1.047<br>(0.061)   | 0.596<br>(0.094)** | 0.572<br>(0.055)** | 0.929<br>(0.076)   | 1.102<br>(0.071)   | 0.719<br>(0.087)** | 0.768<br>(0.054)** | 0.966<br>(0.079)   | 0.916<br>(0.045)   | 0.789<br>(0.052)** | 0.786<br>(0.075)*  |

Notes: Omitted category is finance, insurance and real estate. Grey highlighting indicates models of income decline while the absence of highlighting indicates models of income increase.
